# Supplementary material
Source: PubMed Central journal article supplement (PMC1458774)
Supplement: pnas_0600591103_3.pdf [file pnas_0600591103_3.pdf]

# Innovation

# Amplification

$$P(l | \theta, t) = \frac{e^{-\theta t} (\theta t)^l}{l!}$$

$$P(n | \lambda_{false}, t) = \frac{e^{-\lambda_{false} t} (\lambda_{false} t)^n}{n!}$$

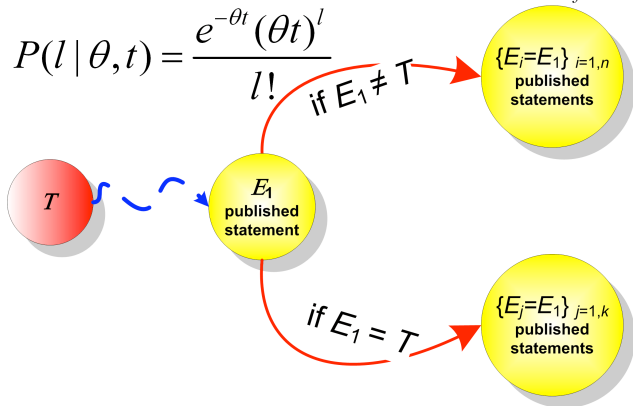

$$P(k | \lambda_{true}, t) = \frac{e^{-\lambda_{true} t} (\lambda_{true} t)^k}{k!}$$
