# Supplementary material
Source: PubMed Central journal article supplement (PMC1458774)

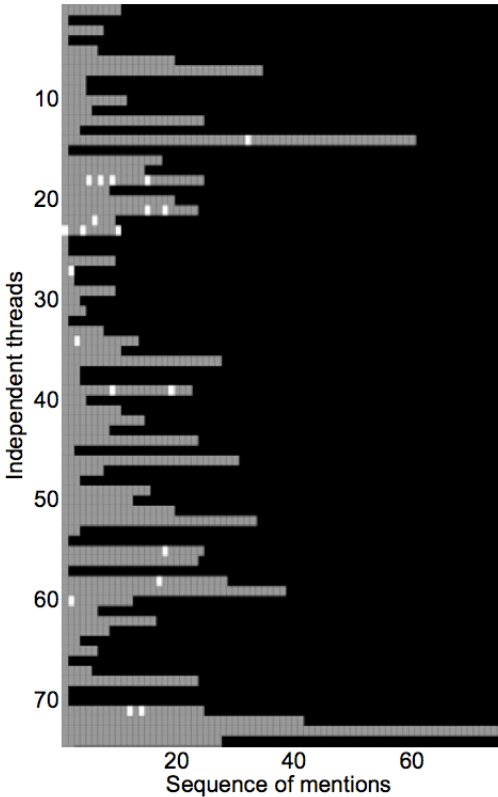

Supplement: pnas_0600591103_1.pdf [file pnas_0600591103_1.pdf]

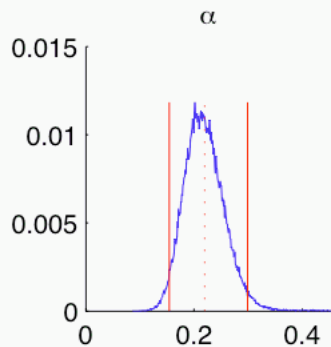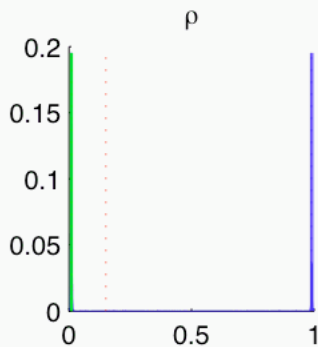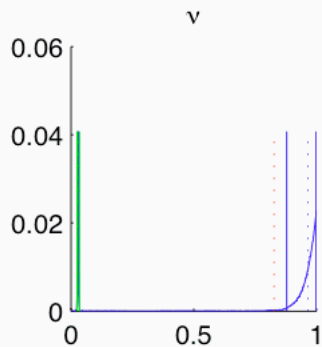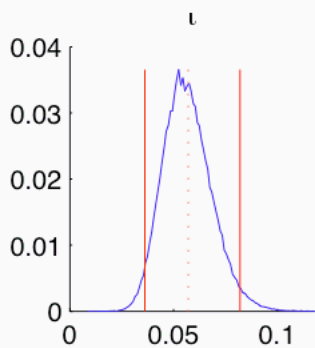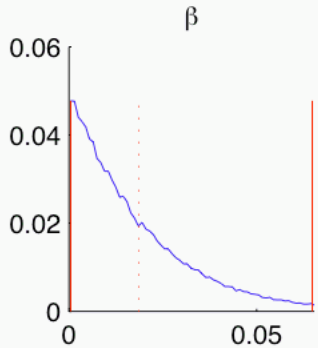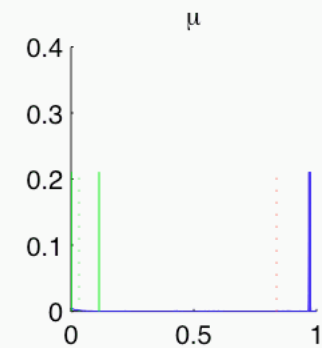

Supplement: pnas_0600591103_10.pdf [file pnas_0600591103_10.pdf]

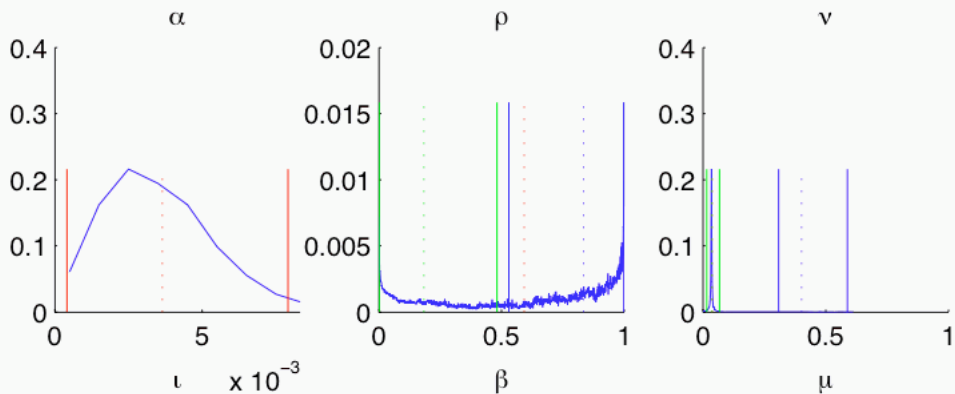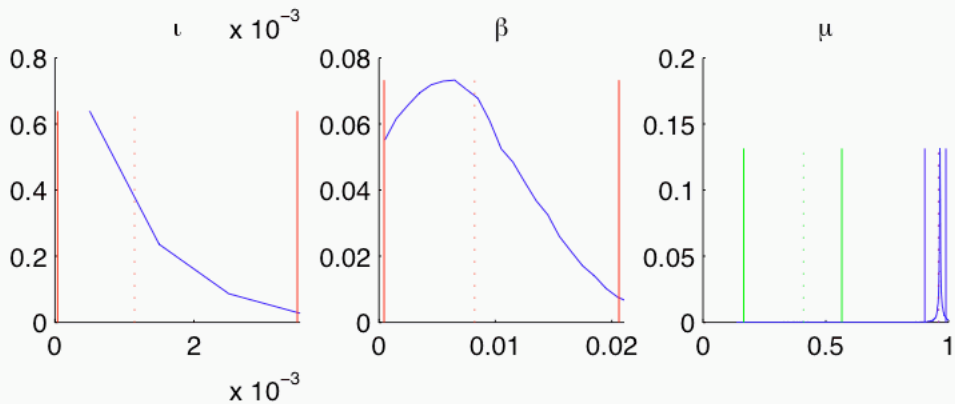

Supplement: pnas_0600591103_11.pdf [file pnas_0600591103_11.pdf]

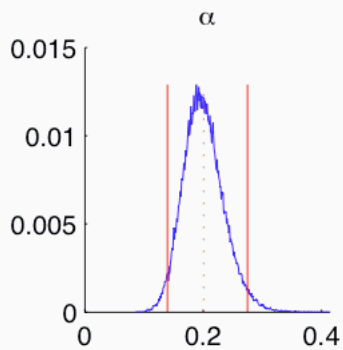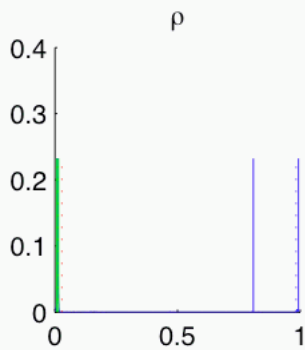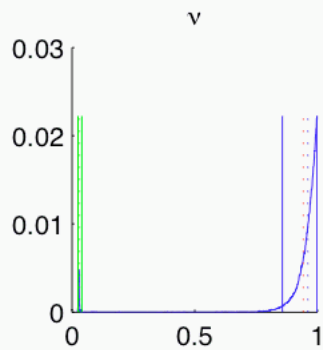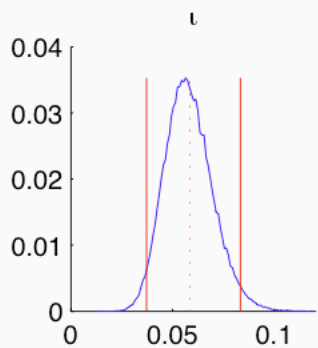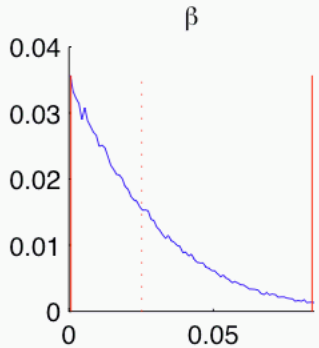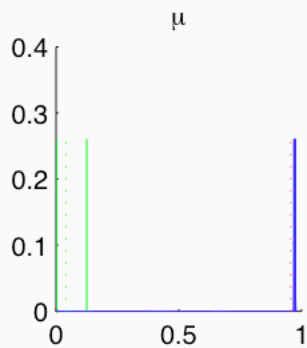

Supplement: pnas_0600591103_12.pdf [file pnas_0600591103_12.pdf]

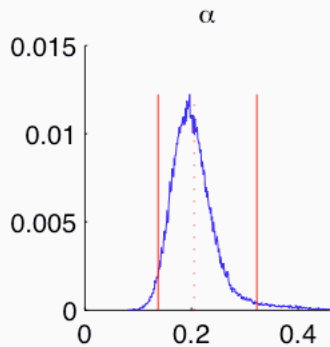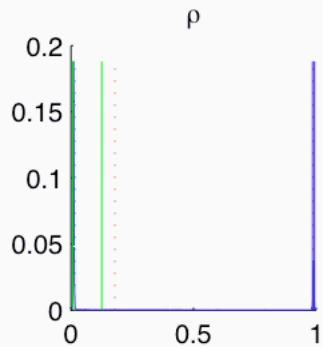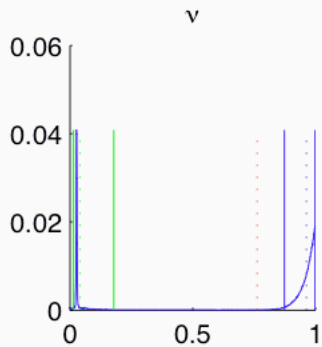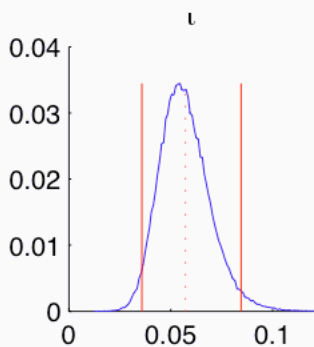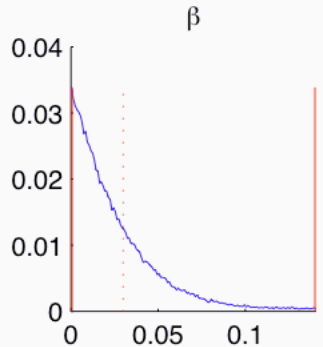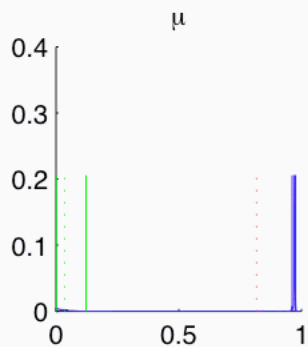

Supplement: pnas_0600591103_13.pdf [file pnas_0600591103_13.pdf]

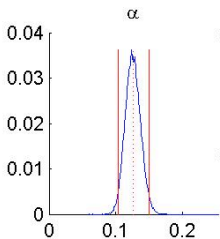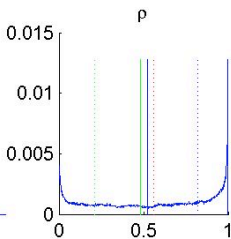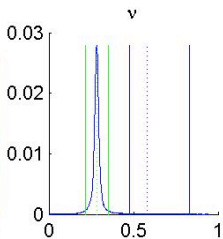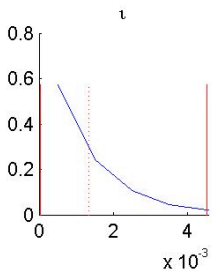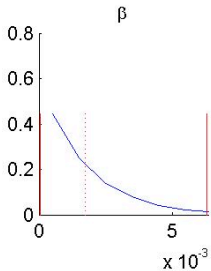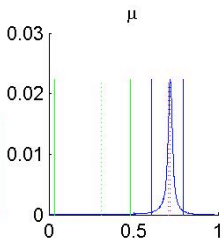

Supplement: pnas_0600591103_14.pdf [file pnas_0600591103_14.pdf]

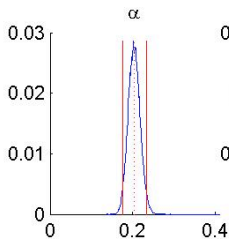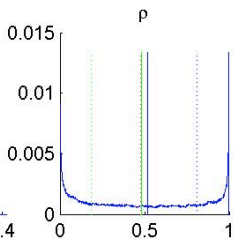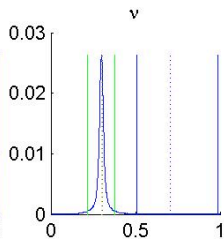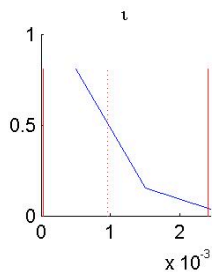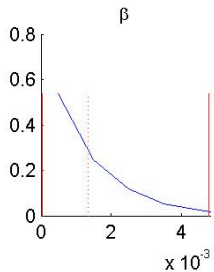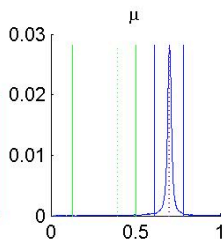

Supplement: pnas_0600591103_15.pdf [file pnas_0600591103_15.pdf]

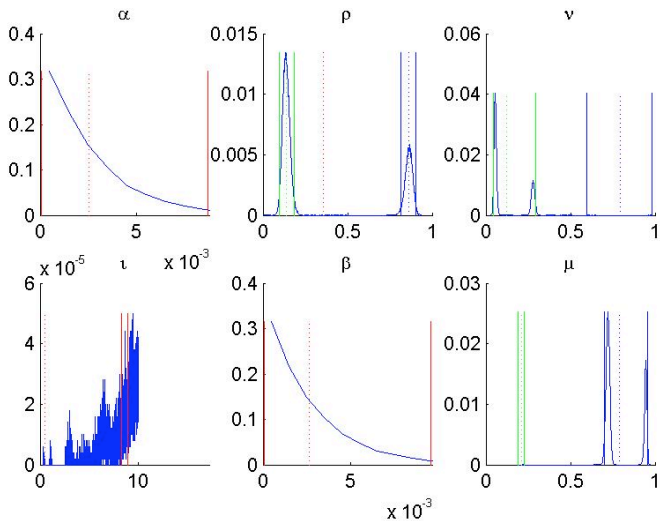

Supplement: pnas_0600591103_16.pdf [file pnas_0600591103_16.pdf]

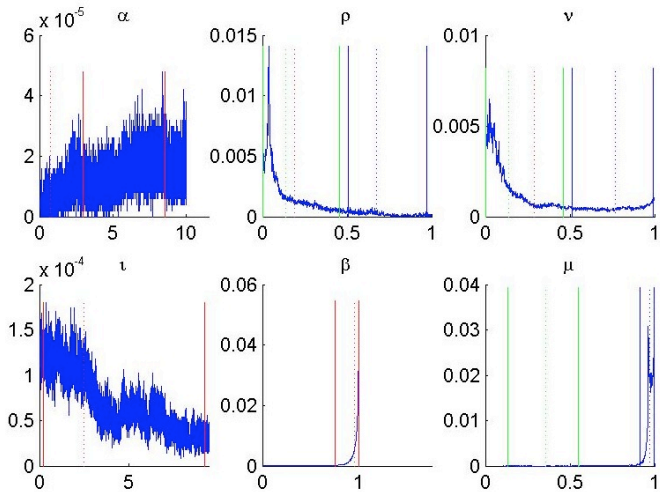

Supplement: pnas_0600591103_17.pdf [file pnas_0600591103_17.pdf]

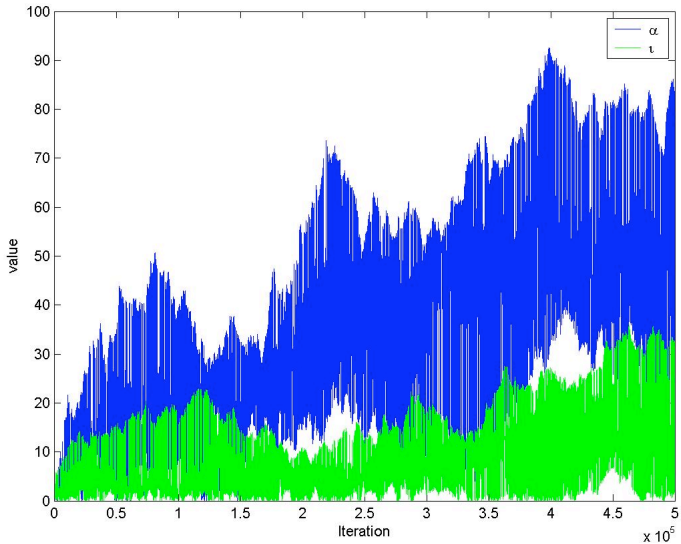

Supplement: pnas_0600591103_18.pdf [file pnas_0600591103_18.pdf]

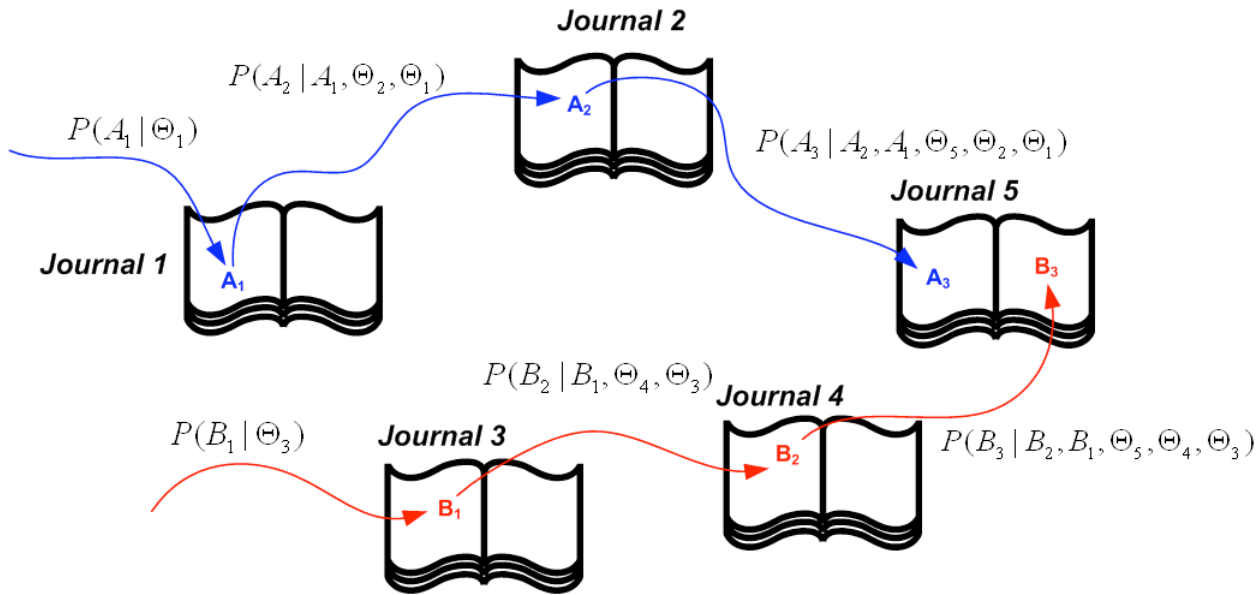

Supplement: pnas_0600591103_2.pdf [file pnas_0600591103_2.pdf]

Repeats: 100000; time: 10;  $\lambda_{true} = 50; \lambda_{false} = 20; \psi = 0.30$ .

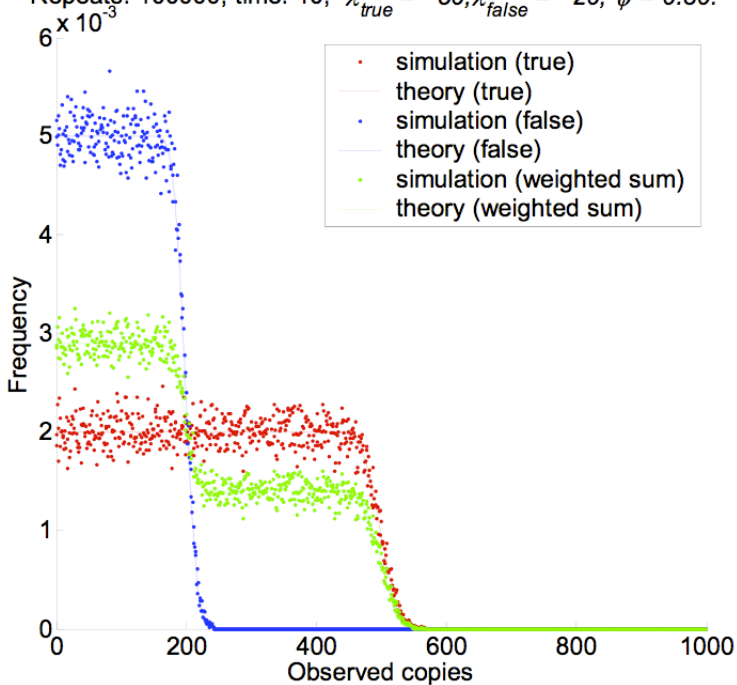

Supplement: pnas_0600591103_4.pdf [file pnas_0600591103_4.pdf]

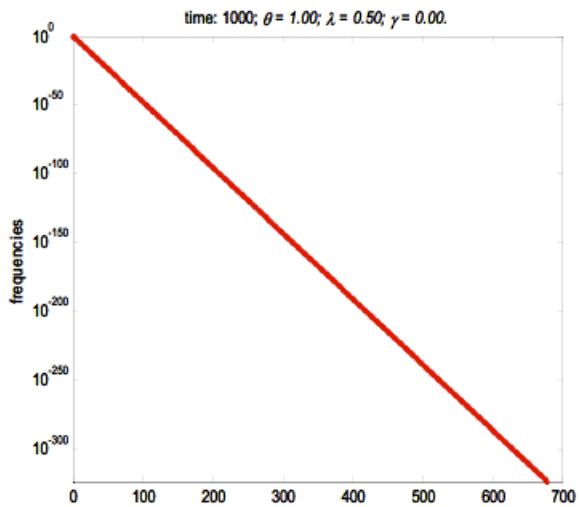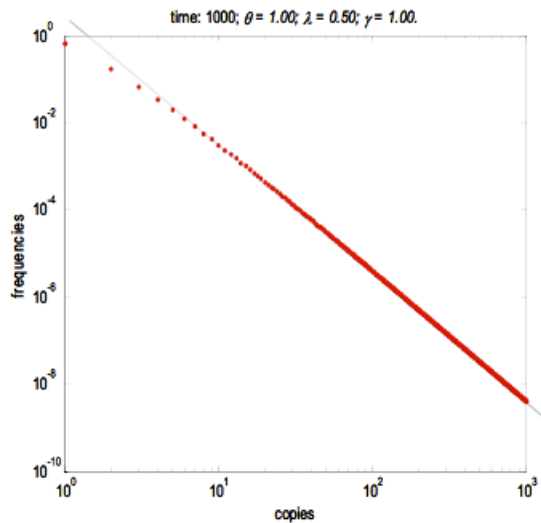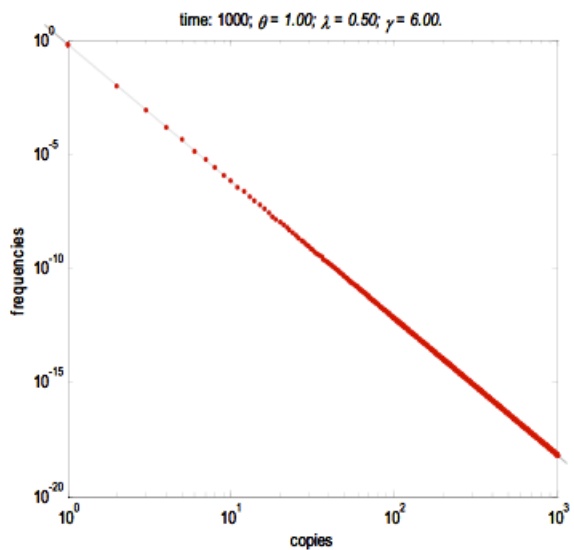

Supplement: pnas_0600591103_5.pdf [file pnas_0600591103_5.pdf]

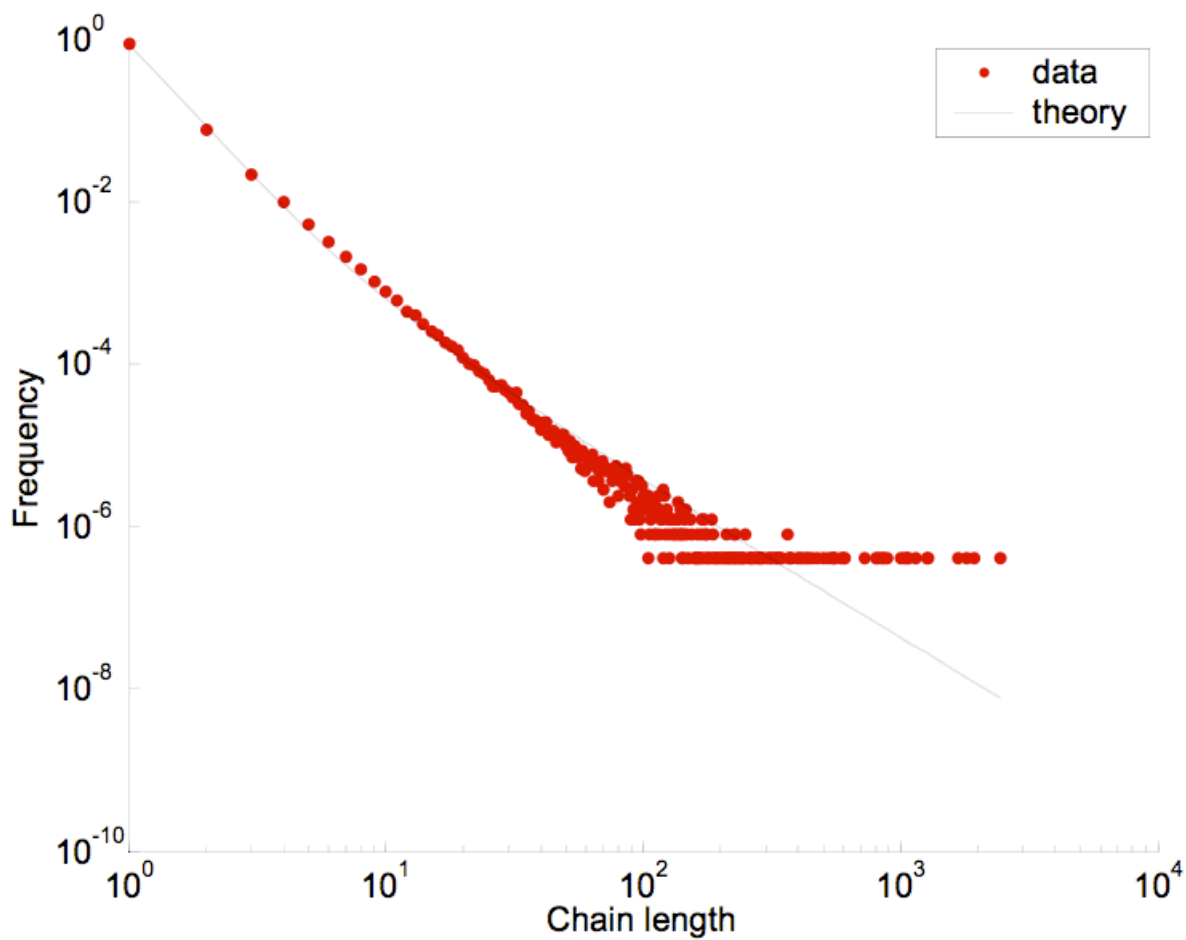

Supplement: pnas_0600591103_6.pdf [file pnas_0600591103_6.pdf]

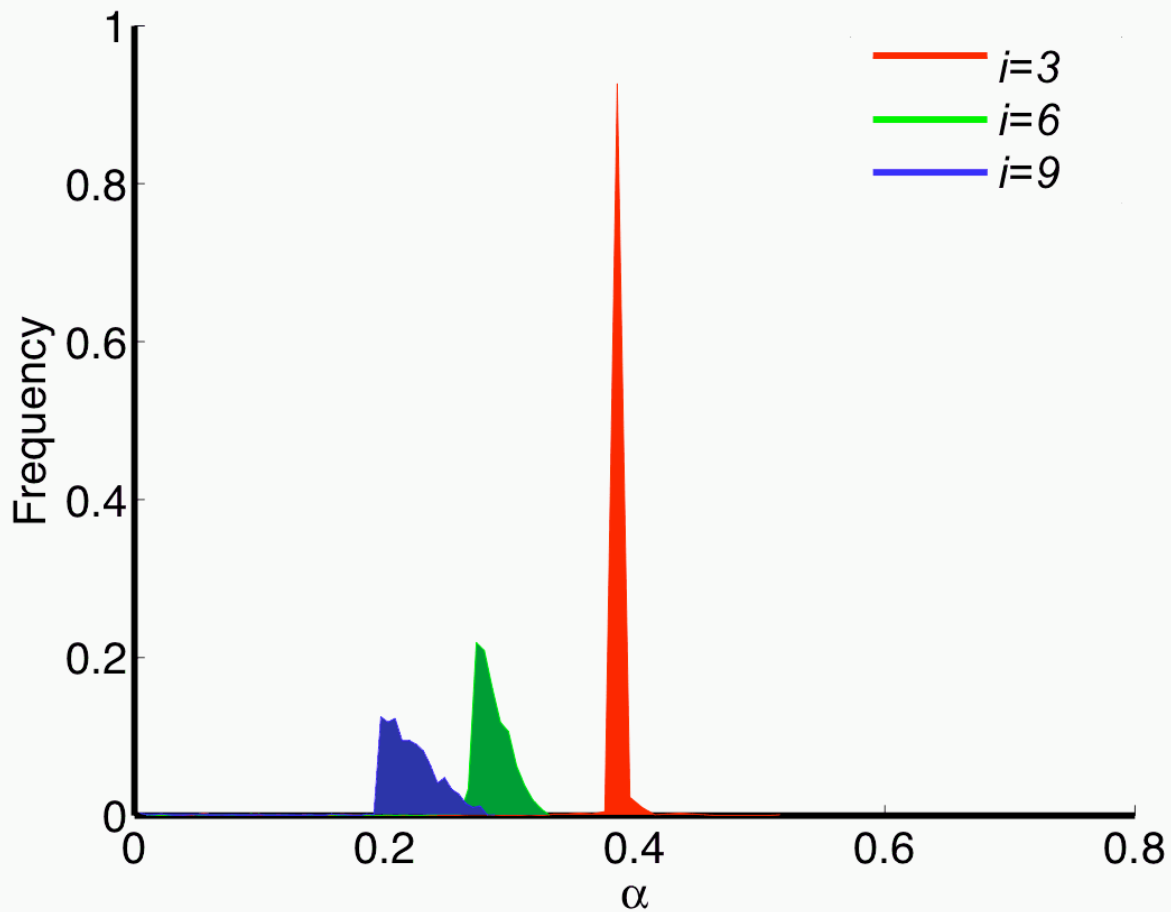

Supplement: pnas_0600591103_7.pdf [file pnas_0600591103_7.pdf]

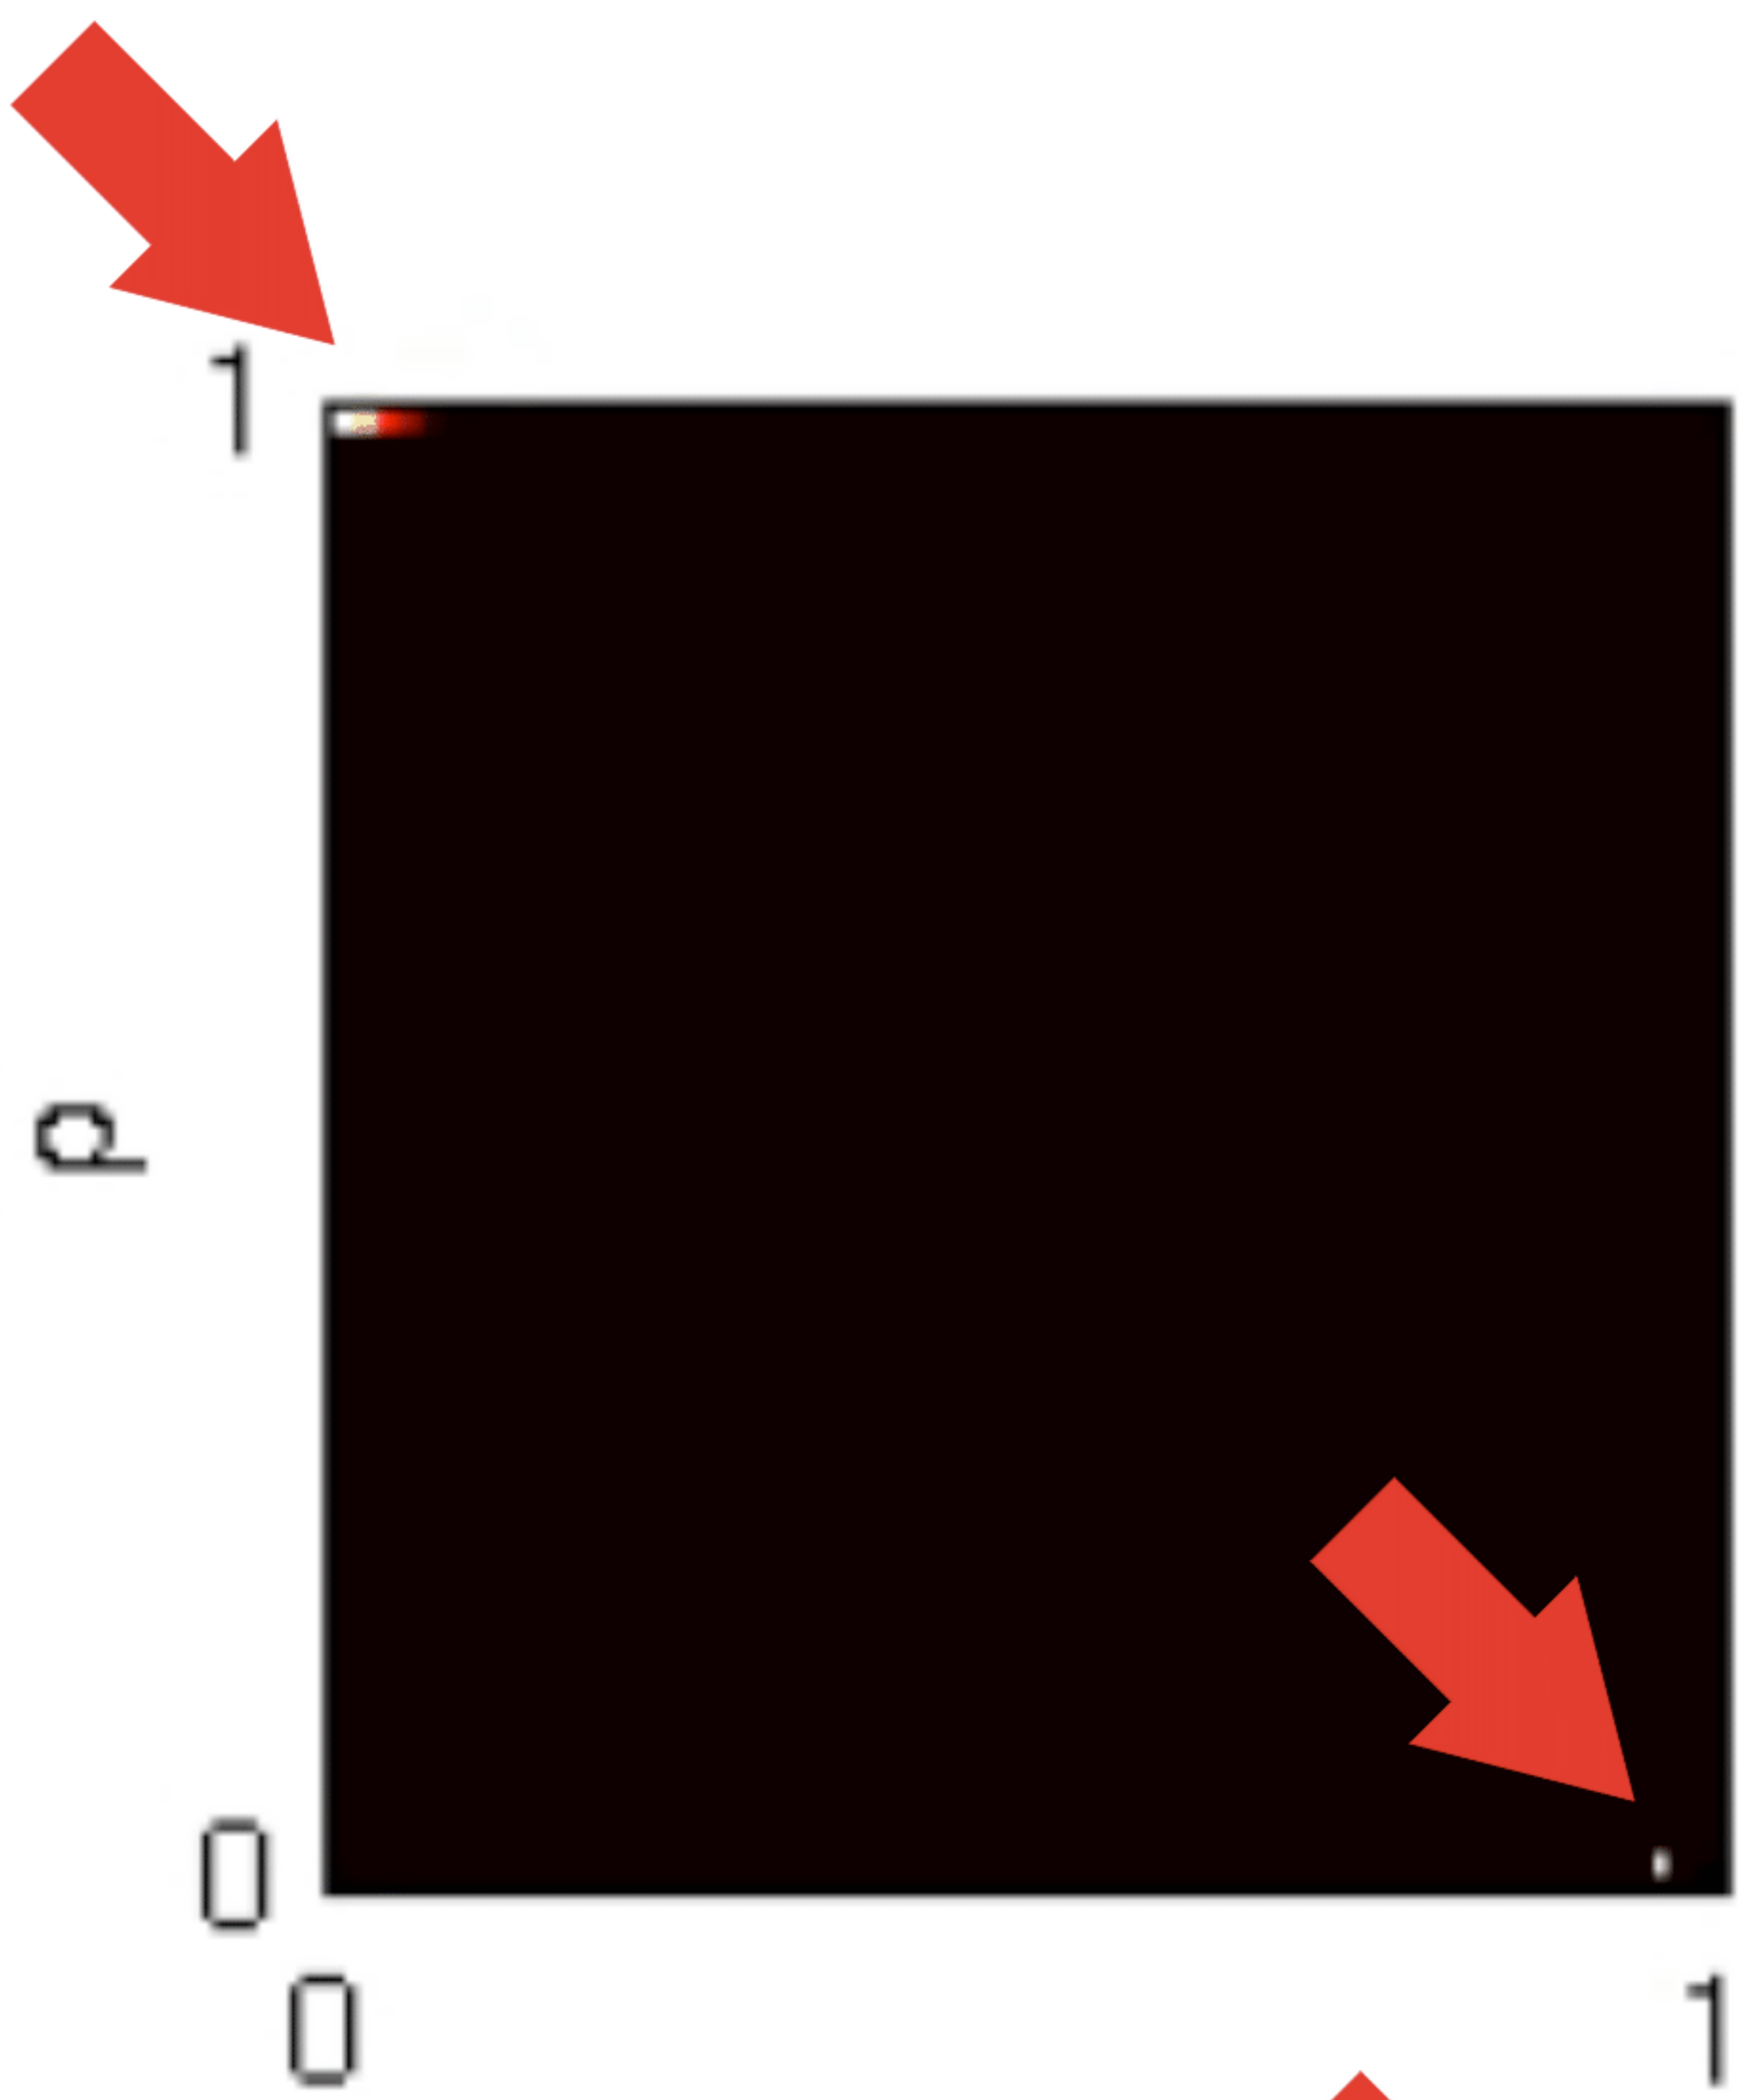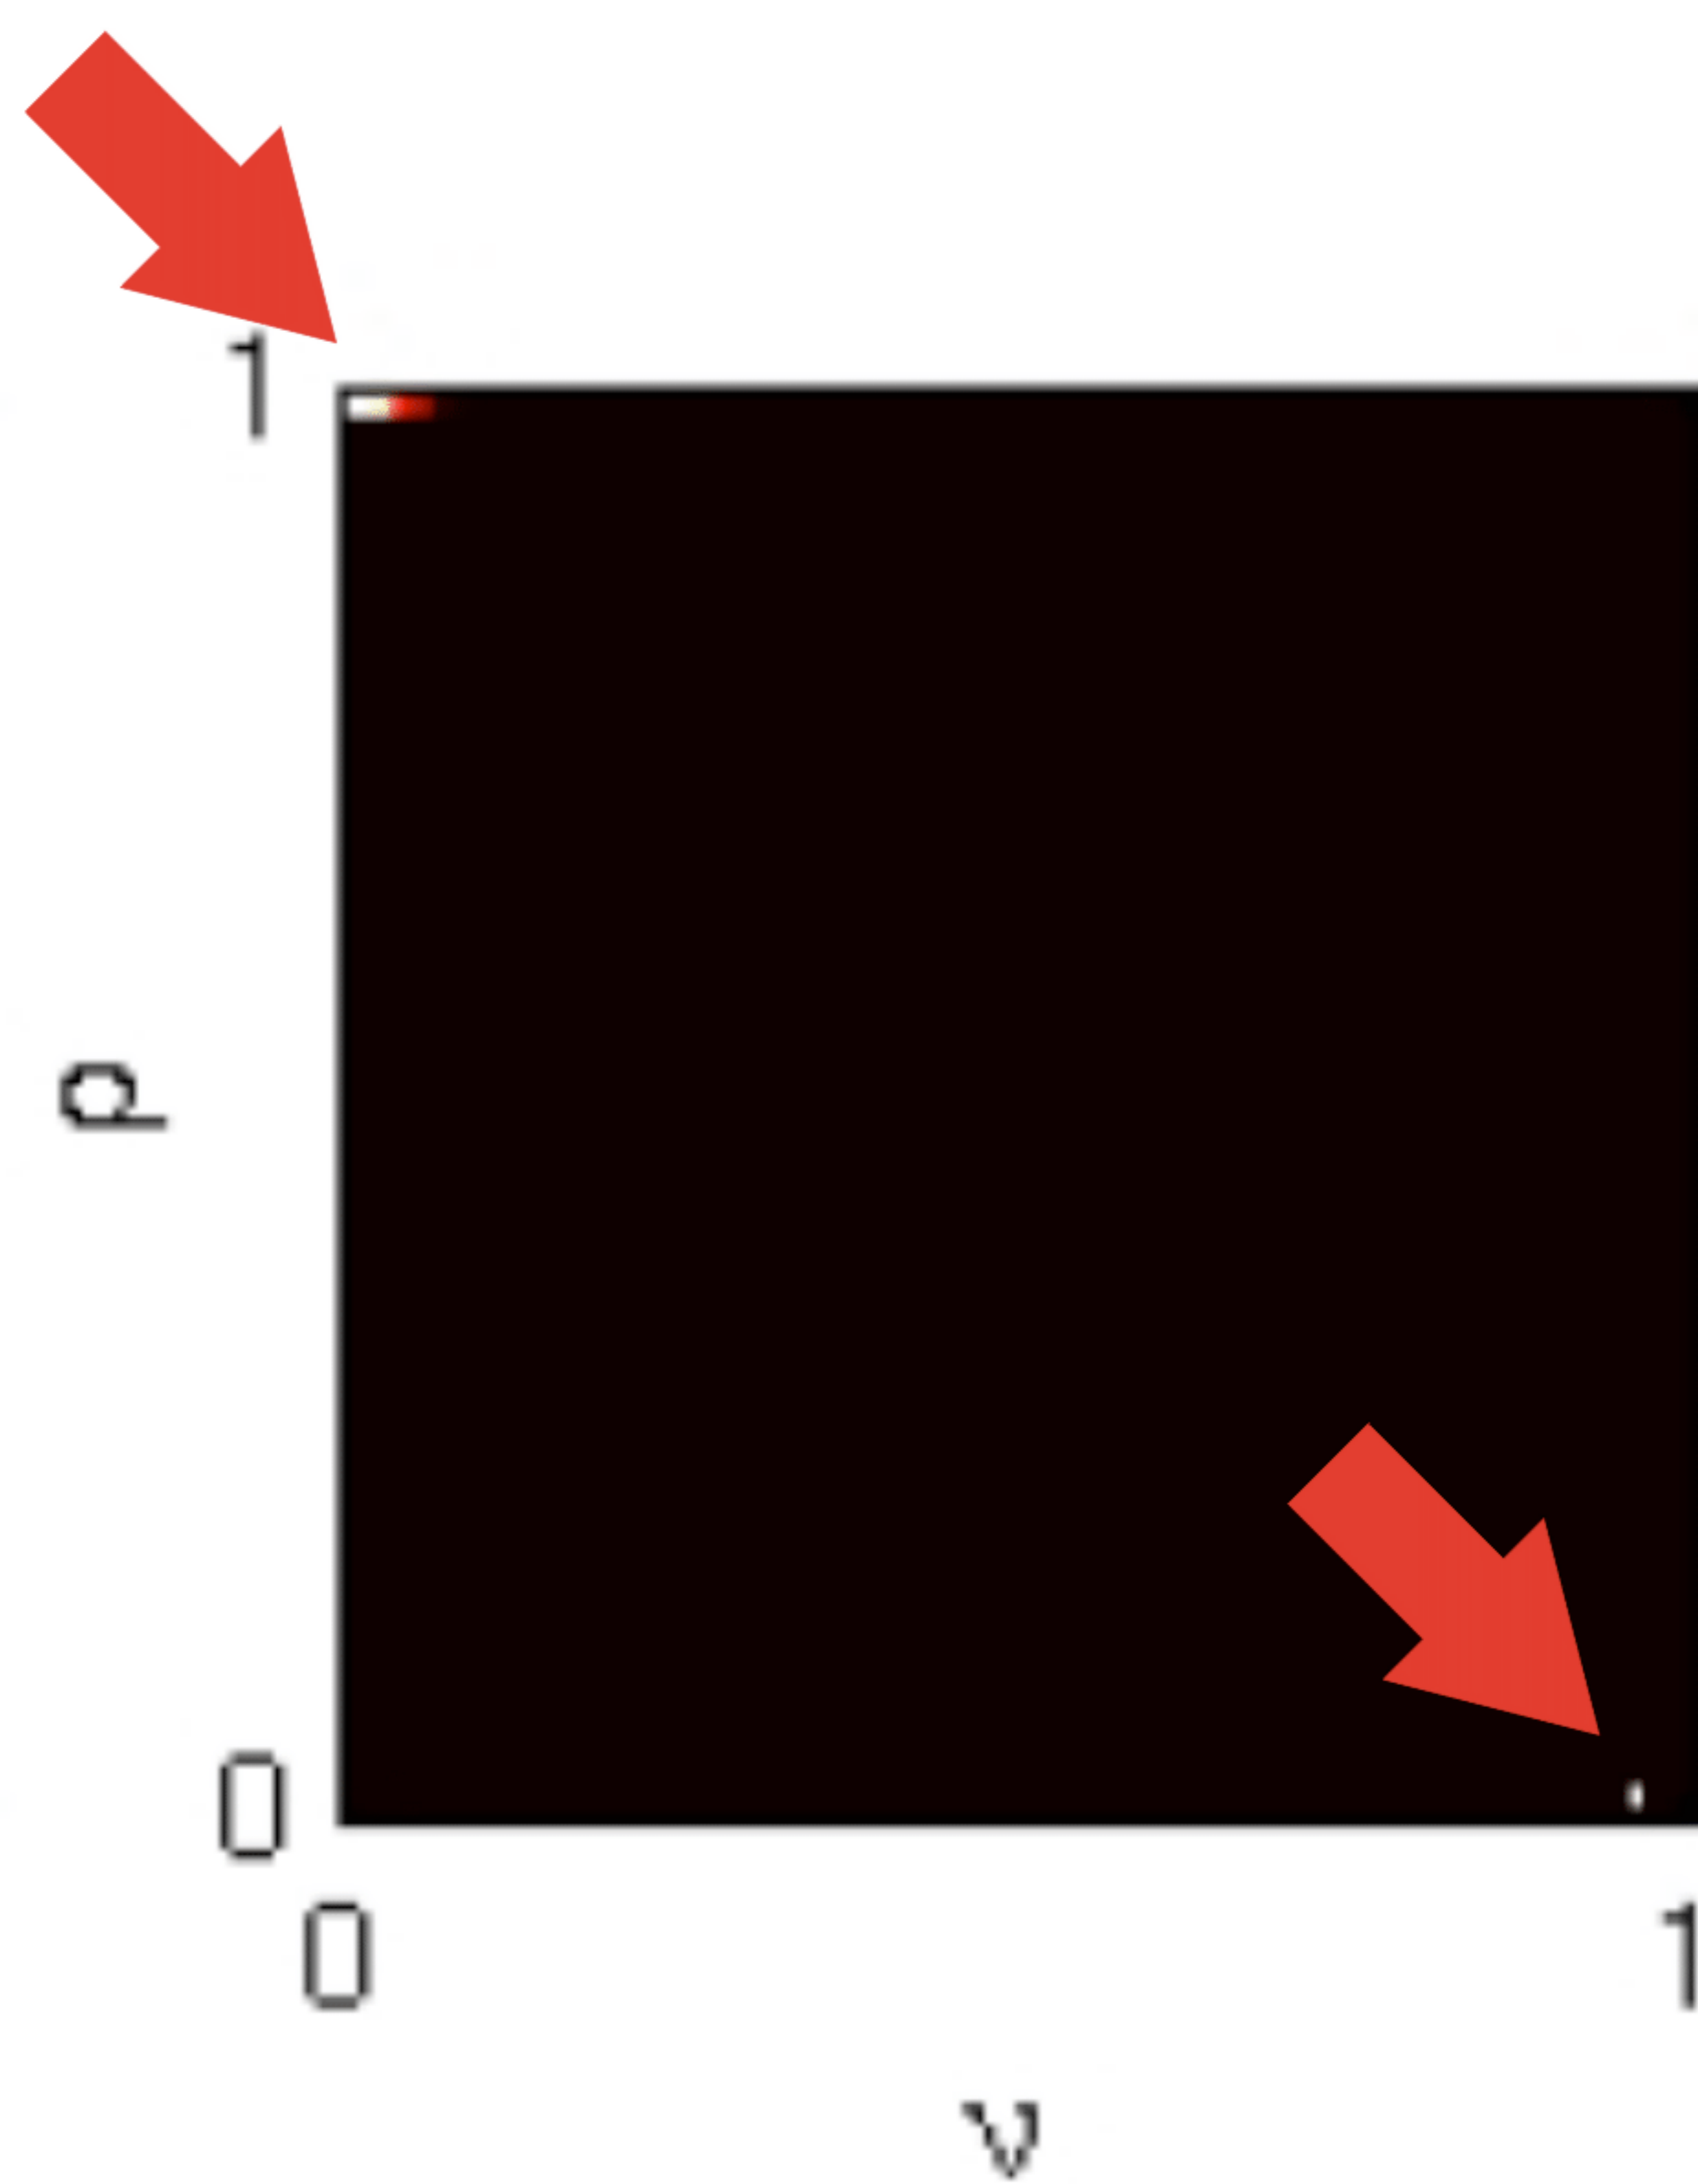

(A)

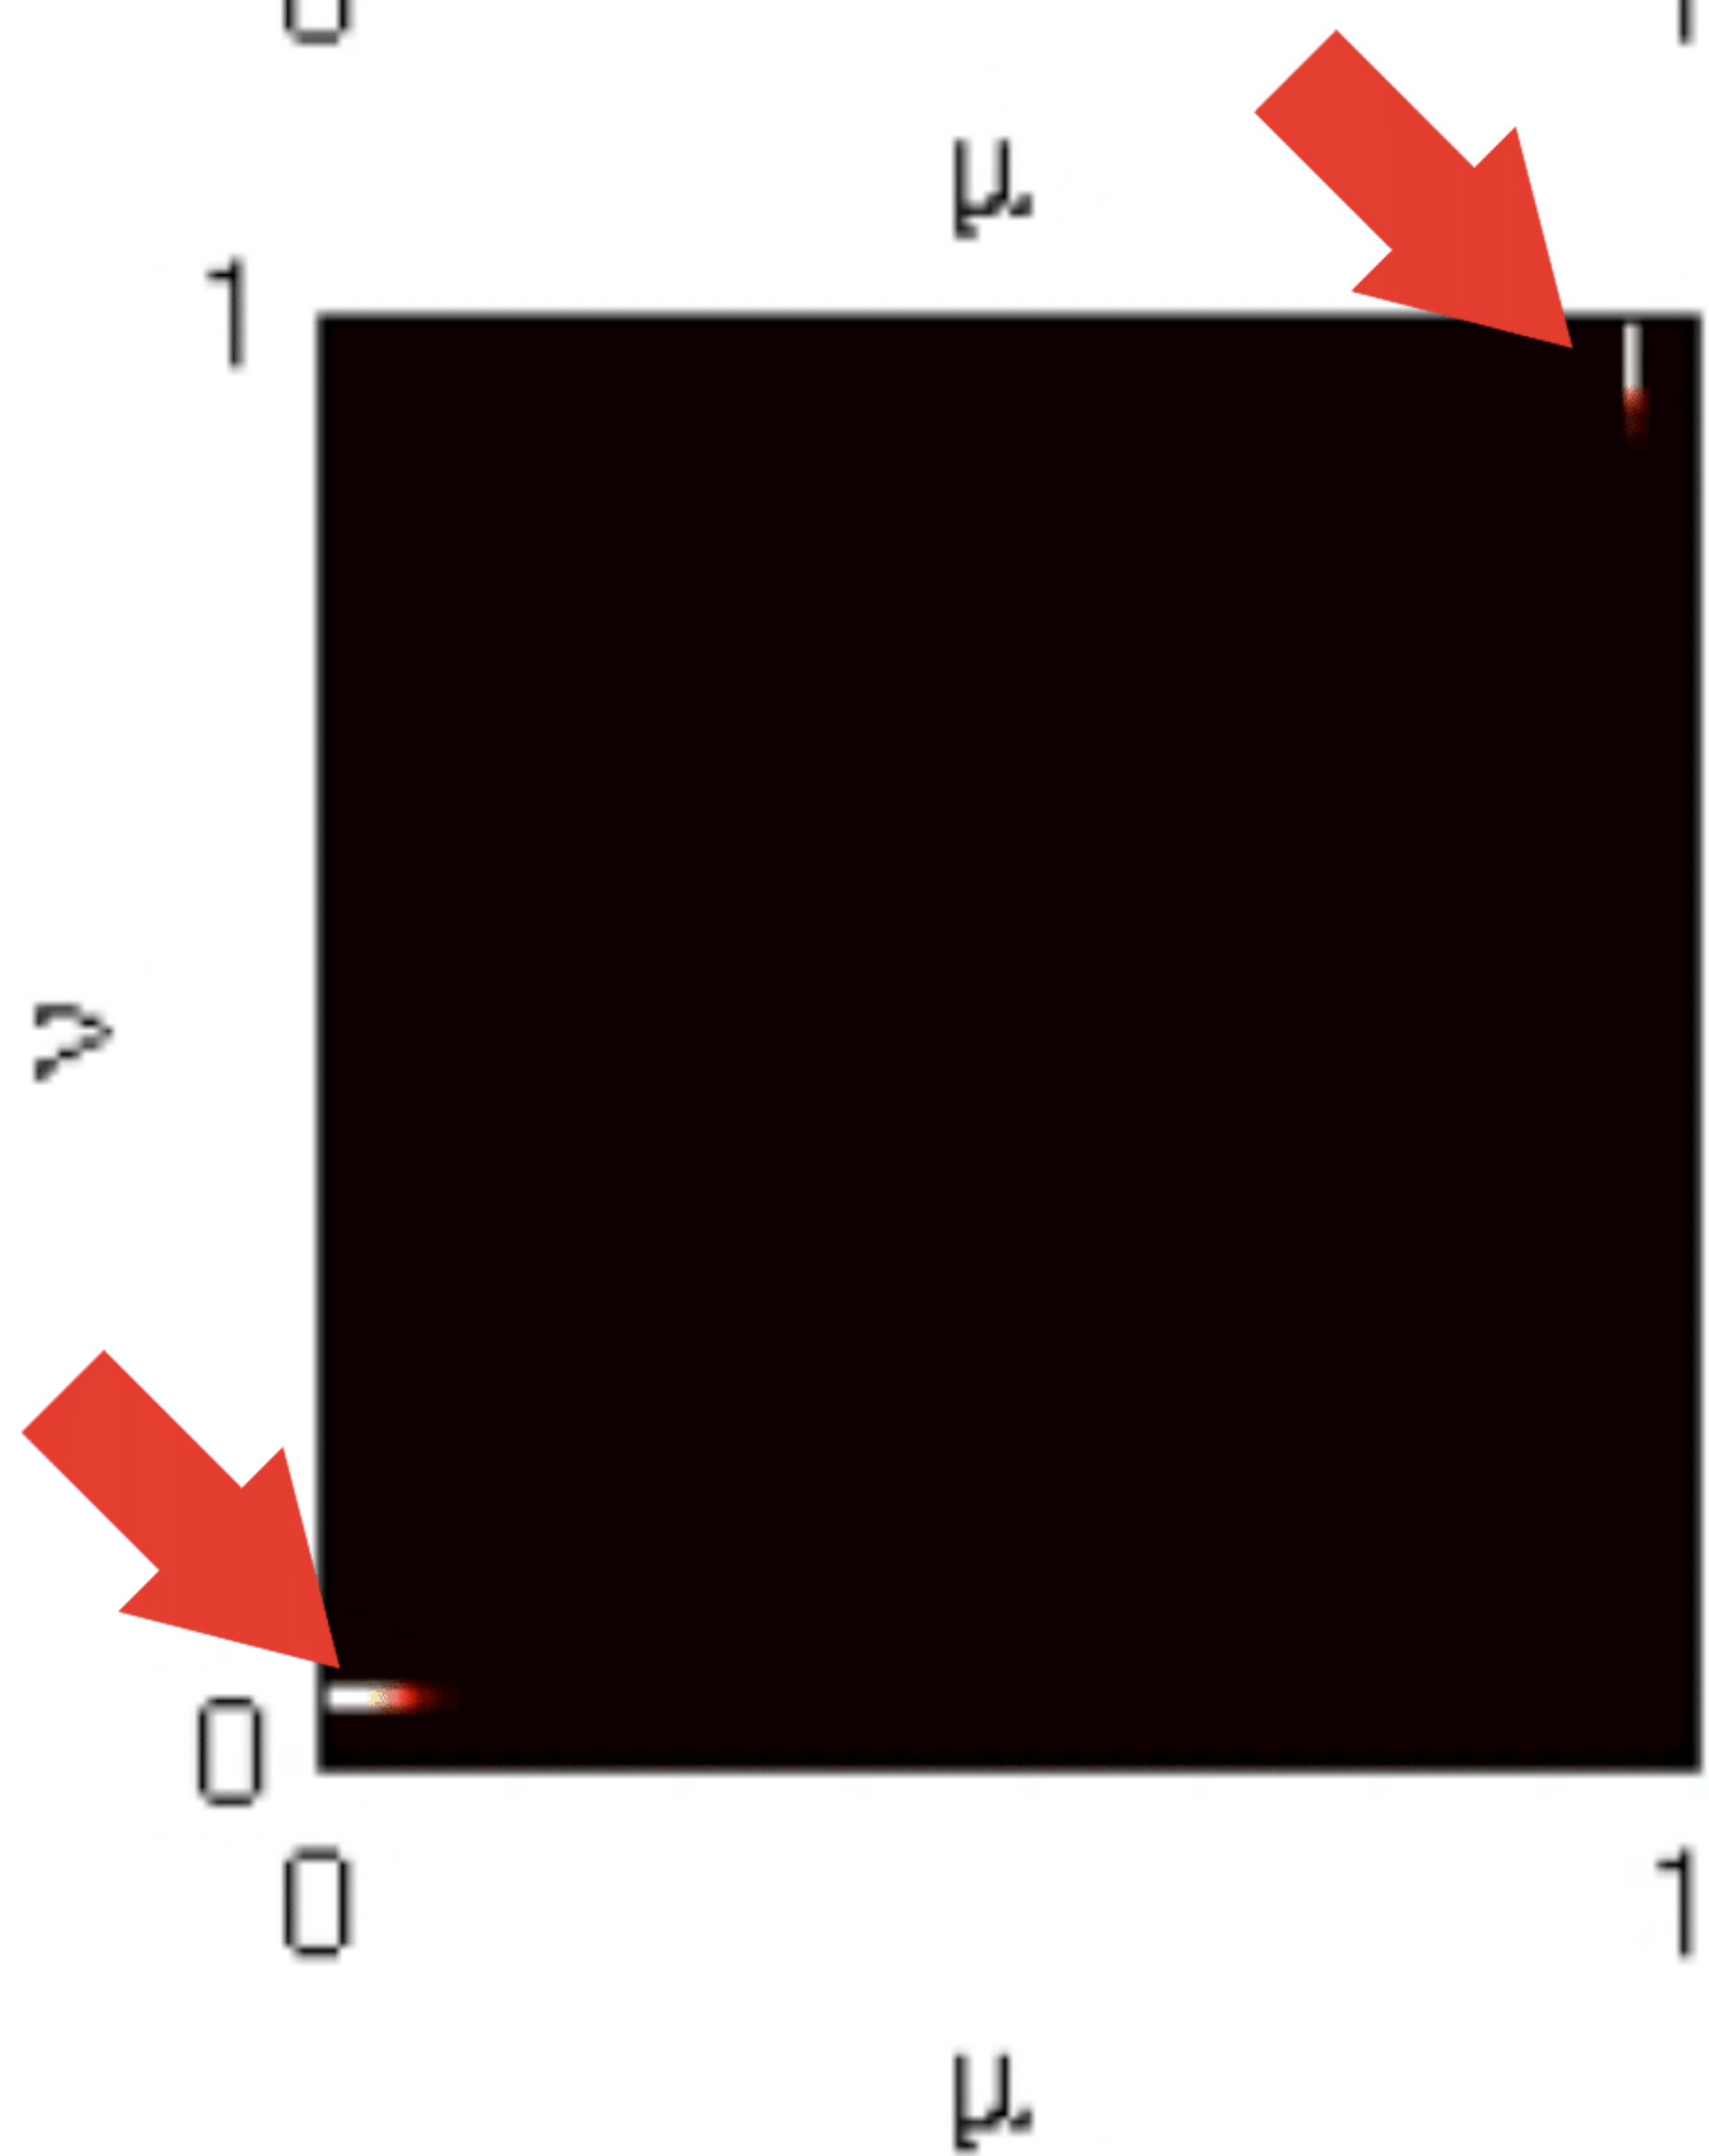

(B)

|          | $\alpha$ | $\iota$ | $\nu$   | $\rho$  | $\mu$   |
|----------|----------|---------|---------|---------|---------|
| $\alpha$ | 1.0000   | 0.8148  | -0.0010 | -0.0076 | 0.0085  |
| $\iota$  | 0.8148   | 1.0000  | -0.0074 | -0.0044 | 0.0014  |
| $\nu$    | -0.0010  | -0.0074 | 1.0000  | -0.9994 | 0.9982  |
| $\rho$   | -0.0076  | -0.0044 | -0.9994 | 1.0000  | -0.9990 |
| $\mu$    | 0.0085   | 0.0014  | 0.9982  | -0.9990 | 1.0000  |

Supplement: pnas_0600591103_8.pdf [file pnas_0600591103_8.pdf]
